# Supplementary material
Source: PubMed Central journal article supplement (PMC2747180)
Supplement: 0905394106_0905394106SI.pdf [file 0905394106_0905394106SI.pdf]

# Supporting Information

Johansson and Lindahl 10.1073/pnas.0905394106

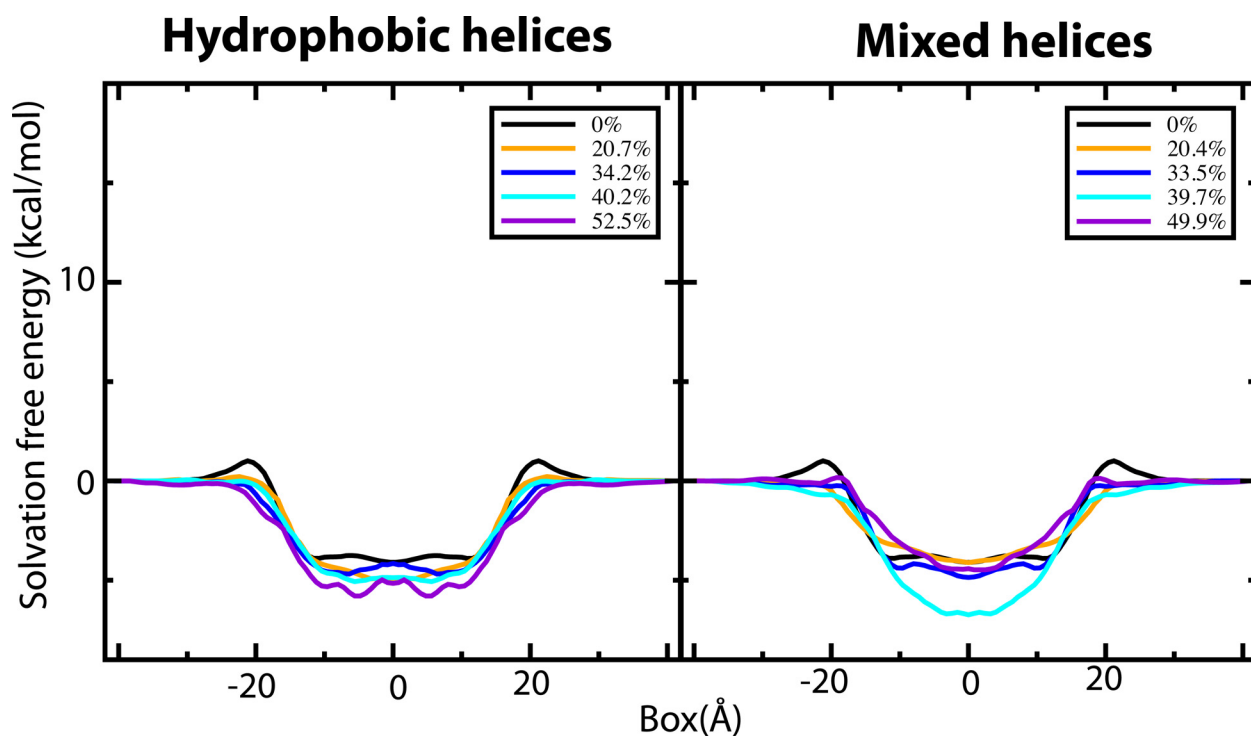

**Fig. S1.** Spatially resolved free-energy profiles for a leucine analog as a function of distance from the bilayer center along the membrane normal, i.e. the direction perpendicular to the membrane, corresponding to the arginine curves in manuscript Fig. 2. The solvation cost for leucine is almost constant for all tested setups.

## Deuterium order parameters

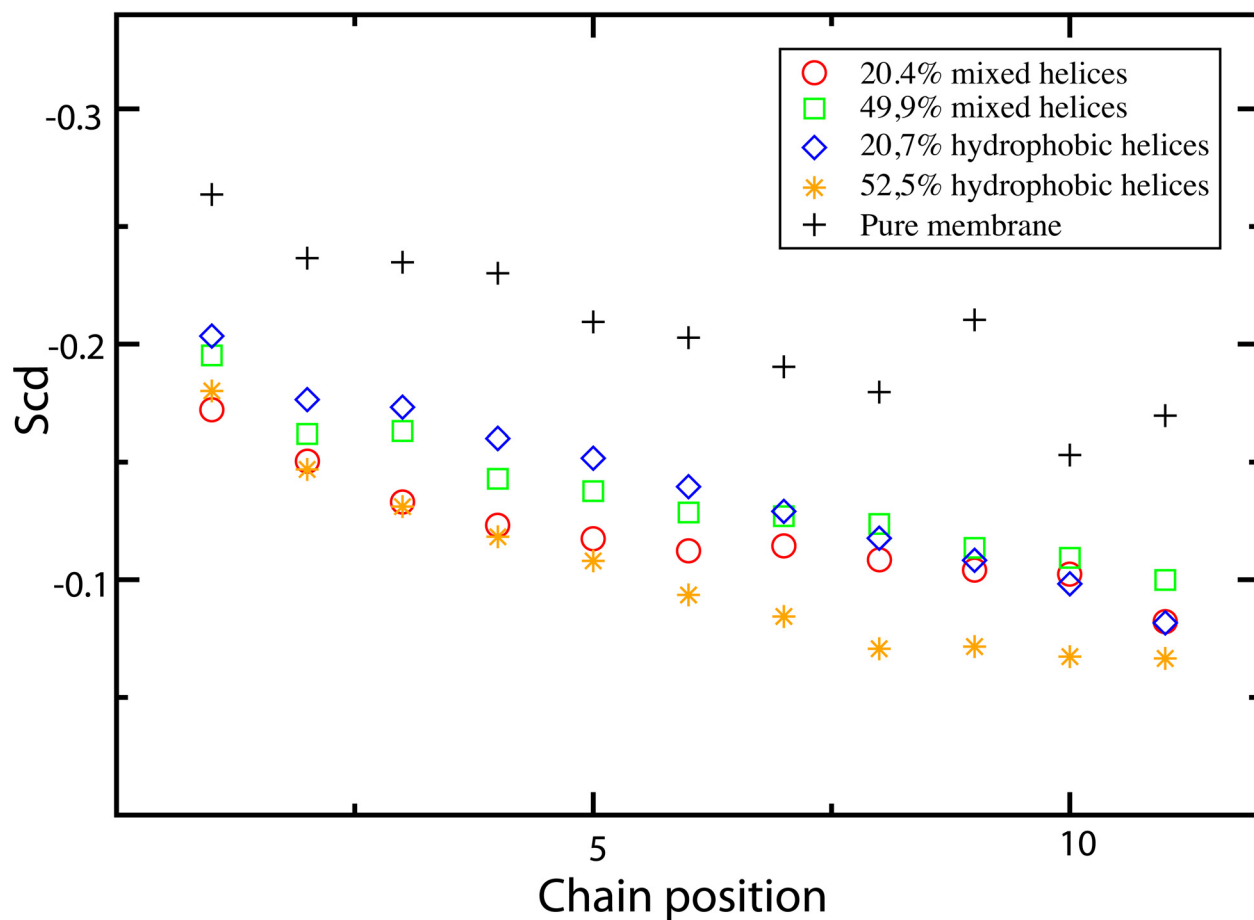

**Fig. S2.** Deuterium order parameters for the saturated lipid tails of the POPC lipids in the different setups, as a measure of the induced bilayer perturbation. The order in the pure bilayer system corresponds well to experimental values but decreases with inserted helices, although the differences between the systems are still relatively small.
